# Supplementary material for: Separation of rare earth elements and nickel harnessing electrochemistry and reactive CO2 capture and mineralization
Source: Royal Society of Chemistry journal article supplement (doi:10.1039/d4cc04632c), 2024-11-09
Supplement: d4cc04632c1.pdf [file d4cc04632c1.pdf]

1  
2  
3  
4  
5  
6  
7  
8  
9  
10  
11  
12  
13  
14  
15  
16  
17  
18  
19  
20  
21  
22  
23  
24  
25  
26  
27  
28  
29  
30  
31  
32

*Supplementary Information for*

*Separation of Rare Earth Elements and Nickel  
Harnessing Electrochemistry and Reactive CO<sub>2</sub> Capture  
and Mineralization*

Prince Ochonma,<sup>1</sup> Akanksha Srivastava,<sup>2</sup> Christopher Noe,<sup>3</sup>  
Tianhe Yin,<sup>2</sup> Prarabdh Jain,<sup>1</sup> and Greeshma Gadikota<sup>1,2,\*</sup>

<sup>1</sup>Smith School of Chemical and Biomolecular Engineering, Cornell University, Ithaca, NY 14853

<sup>2</sup>School of Civil and Environmental Engineering, Cornell University, Ithaca, NY 14853

<sup>3</sup>Department of Chemistry, College of Art and Science, Stony Brook University, Stony Brook, NY  
11790

\*Corresponding author: Email: [gg464@cornell.edu](mailto:gg464@cornell.edu) | Phone: 1-857-253-8724

## 1 Materials

2 Synthetic metal solutions are prepared with distilled and deionized 18 M $\Omega$  cm water using a Milli-  
3 Q system. Solutions bearing REE<sup>3+</sup> and Ni<sup>2+</sup> ions are prepared using lanthanum (III) chloride  
4 heptahydrate (LaCl<sub>3</sub>·7H<sub>2</sub>O, purity 99%), neodymium (III) chloride hexahydrate (NdCl<sub>3</sub>·6H<sub>2</sub>O,  
5 purity 99%), europium (III) chloride hexahydrate (EuCl<sub>3</sub>·6H<sub>2</sub>O, purity 99%), dysprosium (III)  
6 chloride hexahydrate (Dy(NO<sub>3</sub>)<sub>3</sub>·6H<sub>2</sub>O, purity 99%), praseodymium (III) chloride heptahydrate  
7 (PrCl<sub>3</sub>·7H<sub>2</sub>O, purity 99%) and nickel (II) chloride (NiCl<sub>2</sub>, purity 98%), all purchased from Sigma  
8 Aldrich. Diethylenetriamine (DETA, Reagent Plus, purity 99%, Sigma Aldrich),  
9 monoethanolamine (MEA, laboratory grade, weight percent > 95%, Fisher Chemical) and  
10 ammonium hydroxide solution (25 % NH<sub>3</sub> in H<sub>2</sub>O, Honeywell, and 28 % NH<sub>3</sub> in H<sub>2</sub>O, Sigma-  
11 Aldrich) are used as liquid solvents. Electrolytes used for electrochemical measurements are  
12 sodium nitrate (NaNO<sub>3</sub>, purity >99%). Ag/AgCl reference electrodes are purchased from Stony  
13 Lab (Nesconset, NY). Platinum sheet (10mm x 10 mm, thickness 0.1 mm, purity 99.99%) is used  
14 as the counter electrode. Titanium sheet (10 mm x 10 mm, thickness 0.25 mm, 99.7% trace metals  
15 basis) is used as the working electrode. Anion Exchange Membrane (AEM, Fumasep FAM) used  
16 for the bench-scale setup is a Celgard 3501 surfactant-coated porous polypropylene membrane.

17 Aqueous solutions used in REE separation experiments containing ~2.4 g/L of Ni with La to Ni  
18 ratios of 1:2, 1:1, and 2:1 is prepared by dissolving LaCl<sub>3</sub>·7H<sub>2</sub>O and NiCl<sub>2</sub> in de-ionized water.  
19 Subsequently the pH is adjusted to 6 to prevent any precipitation via hydrolysis.<sup>1</sup> Similarly,  
20 different REE and Ni solutions containing 2.4 g/L of Ni and REEs are prepared by dissolving  
21 NdCl<sub>3</sub>·6H<sub>2</sub>O, EuCl<sub>3</sub>·6H<sub>2</sub>O, Dy(NO<sub>3</sub>)<sub>3</sub>·6H<sub>2</sub>O, PrCl<sub>3</sub>·7H<sub>2</sub>O, and NiCl<sub>2</sub> in de-ionized water. Control  
22 experiments are performed by directly bubbling CO<sub>2</sub> into the metal bearing solution and using CO<sub>2</sub>  
23 loaded NaOH. The effectiveness of regenerable solvents such as NH<sub>4</sub>OH, MEA and DETA in  
24 facilitating the recovery of REE carbonates is investigated. 20 ml of 0.5 M CO<sub>2</sub> loaded NH<sub>4</sub>OH,  
25 MEA or DETA is added to 20 ml of the solution bearing metals. The resulting solution containing  
26 0.25 M CO<sub>2</sub> loaded NH<sub>4</sub>OH, MEA or DETA and 1.2 g/L of Ni in different Ni: REEs is then reacted  
27 for 60 minutes. The CO<sub>2</sub> loaded solvent is obtained by bubbling 10% CO<sub>2</sub> gas mixture through the  
28 solvent for ~ 12 hours. Solid precipitates are then collected via centrifugation and dried in an oven  
29 for further characterization.

30

## 1 Electrodeposition Measurements

2 All electrochemical measurements are performed with a potentiostat (Interface 1010E, Gamry  
3 Instruments) in a H-Type Electrolytic Cell using a 3-electrode system. The working electrode  
4 (cathode) is a piece of titanium sheet with an area of  $1 \times 1 \text{ cm}^2$  ( thickness of 0.25 mm). The  
5 reference and counter (anode) electrodes are Ag/AgCl electrode and a platinum sheet with an area  
6 of  $1 \times 1 \text{ cm}^2$  (thickness of  $\sim 0.1 \text{ mm}$ ), respectively. All potentials in this work are in reference to  
7 Ag/AgCl unless otherwise specified. Electrodeposition experiments are performed in three distinct  
8 modes. Mode 1 represents the base case experiments to elucidate the effect of solvents in this  
9 recovery process. These base case electrochemical measurements are performed using 40 ml of  
10 1.2 g/L Ni solution and 0.25 M of solvents of either  $\text{NH}_4\text{OH}$ , MEA or DETA as the catholyte. In  
11 mode 2, the solution bearing nickel, and the solvent are first contacted with 10%  $\text{CO}_2$  for 2 hours  
12 prior to electrochemical measurements. The hypothesis that the formation of carbamate could  
13 facilitate ease of Ni deposition is tested in this mode. In mode 3,  $\text{CO}_2$  is bubbled through the  
14 catholyte solution during electrochemical measurements. All experiments for alkaline electrolysis  
15 are performed using 40 ml of 0.25 M  $\text{NaNO}_3$  as the anolyte. All experiments are conducted at  
16 room temperature. To investigate the influence of  $\text{CO}_2$  on electrodeposition, the gas containing  
17 10%  $\text{CO}_2$  is supplied continuously at 1 atm to the catholyte during electrodeposition.

## 18 Product Characterization

19 Solid and liquid samples are obtained for every experiment after separation and decantation using  
20 a centrifuge. The recovered solid is washed with deionized water and then dried in an oven at 100  
21 ( $\pm 3$ )  $^\circ\text{C}$  for 12 hours, while known amounts of the recovered liquid are prepared for further  
22 analysis by dilution with 5 wt.% nitric acid. To determine the quantitative efficiencies of these  
23 experiments, concentrations of metal cations in the liquid solutions before and after experiments  
24 are determined via Inductively Coupled Plasma - Optical Emission Spectroscopy (ICP-OES). The  
25 recovery efficiencies, separation factor, and purity of the recovered solid are determined using the

26 **Equations 1 - 4** below.

$$27 \eta_{mi} = \frac{C_{mi} * V_m - C_{ji} * V_j}{C_{mi} * V_m} * 100 \quad (1)$$

$$1 \quad P_{mi} = \frac{C_{mi} * V_m - C_{ji} * V_j}{\sum_{i=1}^k (C_{mi} * V_m - C_{ji} * V_j)} * 100 \quad (2)$$

$$2 \quad \beta = \frac{D_{mi}}{D_{mj}} \quad (3)$$

$$3 \quad D_m = \frac{C_c}{C_s} \quad (4)$$

4 In the equations above,  $\eta_{mi}$  is the recovery efficiency of metal “i” measured in %,  $P_{mi}$  is the purity  
5 of metal “i” carbonate product, and the separation factor is defined as  $\beta$ .  $C_{mi}$  and  $C_{ji}$  are the  
6 concentration of metal “i” in solution before (m) and after (j) either CO<sub>2</sub> mineralization or  
7 electrodeposition experiments respectively, and  $C_c$  and  $C_s$  are the moles of metal in the carbonate  
8 and in the solution phase, respectively.  $V_m$  and  $V_j$  represent the volume of the solutions before and  
9 after the experiments respectively,  $D_i$  and  $D_j$  compare the affinity of a metal M in each phase as  
10 either carbonate or soluble complex, and k is the total number of metals dissolved in solution at  
11 the start of the experiment. The quantification and speciation of CO<sub>2</sub> in the different solvents  
12 including NH<sub>4</sub>OH, MEA, and DETA are investigated using <sup>13</sup>C Nuclear Magnetic  
13 Resonance (NMR) and Fourier Transformed Infrared (FTIR) spectroscopy. NMR data are  
14 acquired on a 500 MHz Bruker AVIII spectrometer equipped with a Prodigy BBO probehead. <sup>13</sup>C  
15 spectra are acquired with 1024 scans, 30 seconds relaxation delay, 32.5 kHz spectral width, and  
16 1.5 s acquisition time. The spectra are processed in MNova (version 14.2.3, Mestrelab Research  
17 S.L.). The FIDs are zero filled to 128k points prior to Fourier transform. Automatic phase  
18 correction is applied followed by baseline correction with 7th-order Bernstein polynomials.  
19 Spectra are superimposed and the frequencies are aligned using solute signals and integrated using  
20 automatic linear correction for solute signals.

21 The dried solids are weighed and characterized further. The release of volatile components  
22 resulting in changes in the sample weight and thermal decomposition behavior of carbonate  
23 products are determined using a Thermogravimetric Analyzer (TGA, Discovery SDT 650, TA  
24 instrument). The samples are heated from room temperature to 1000 °C at a ramp rate of 5 °C/min  
25 under a constant N<sub>2</sub> flow rate (50 mL/min). The crystalline phases of the carbonate product and  
26 electrodeposited nickel are determined using X-ray Diffraction (XRD) (X-ray diffractometer,  
27 Bruker D8 Advance ECO powder diffractometer) with Cu K $\alpha$  radiation (40 kV, 25 mA). The

1 samples are scanned over the  $2\theta$  range from  $20^\circ$  to  $80^\circ$ . The obtained data are analyzed by Jade  
2 software, and crystalline species are identified by the International Centre for Diffraction Data  
3 (ICDD) database. The chemical bonding and functional groups in the synthesized products are  
4 evaluated using FTIR, acquired in an Attenuated Total Reflection (ATR) mode using an  
5 Attenuated Total Reflection-Fourier Transform Infrared spectrometer (ATR-FTIR, Nicolet™  
6 iS50, Waltham, MA). Finally, the morphologies of these samples are observed using a Scanning  
7 Electron Microscope (SEM, Zeiss LEO 1550 FESEM). X-ray photoelectron spectroscopy (XPS)  
8 survey scans are used to examine the chemical states and surface compositions of the products.  
9 The CasaXPS curve resolution platform is used to analyze the peaks of interest using a  
10 combination of 30/70% Lorentzian/Gaussian functions, along with a Shirley or Tougaard  
11 background. These measurements together provide detailed insights into the chemical and  
12 morphological characteristics of the REE carbonate products, and electrodeposited Ni recovered  
13 during  $\text{CO}_2$ -assisted metal separation and recovery.

#### 14 **Coulombic Efficiency Calculations**

$$15 \quad \eta_C = m/M \quad (5)$$

16 The nickel current/coulombic efficiency ( $\eta_C$ ) was calculated using the **equation 5**, where  $m$  is the  
17 experimental mass of nickel deposited on the surface of the titanium electrode, and  $M$  is the  
18 theoretical mass calculated by considering all the charge supplied for the nickel reduction process.  
19

20 In this study Titanium sheet was used to electrodeposit nickel. Platinum and glassy carbon  
21 electrodes have been reported to have a higher activity for hydrogen evolution as well as nickel  
22 reduction compared to the titanium electrode.<sup>2</sup> However these materials are expensive for scale up  
23 considerations. Furthermore, it has been reported that titanium shows good resistance to the  
24 presence of chloride ions.<sup>3</sup>

25

26

27

28

29

1  
2  
3  
4  
5  
6  
7  
8  
9  
10  
11  
12  
13

**Table S.1:** REE and Nickel recovery efficiencies in carbonate product and La product purity for REEs and Nickel separation measurements. The starting concentration of Nickel is constant (2.4 g/L) for all experiments while REE concentrations are varied depending on the REE to Ni ratios. 1:2, 1:1 and 2:1 represent 1.2 g/L REE: 2.4 g/L Ni, 2.4 g/L REE: 2.4 g/L Ni, 4.8 g/L REE: 2.4 g/L Ni respectively. All experiments are carried out under atmospheric conditions (25°C, 1 bar). \* shown in separation factor represents the lowest values obtained in cases where the highest values are indeterminate ( $\infty$ ) as a result of zero nickel distribution.

| Experimental                                                                          | REE Recovery Efficiency [Nickel co-recovered] (%) | Lanthanum Product Purity (%) | Separation Factor ( $\beta$ ) |
|---------------------------------------------------------------------------------------|---------------------------------------------------|------------------------------|-------------------------------|
| Deionized water + Solution bearing La and Ni (1:2)                                    | 0 [0]                                             | 0 [0]                        | 0 [0]                         |
| CO <sub>2</sub> bearing NaOH solvent + Solution bearing La and Ni (1:2)               | 99.89 ( $\pm$ 0.1) [70.73 ( $\pm$ 0.5)]           | 46.37 ( $\pm$ 0.7)           | 370.48 ( $\pm$ 8.21)          |
| CO <sub>2</sub> bearing NH <sub>4</sub> OH solvent + Solution bearing La and Ni (1:2) | 99.86 ( $\pm$ 0.04) [14.64 ( $\pm$ 2.13)]         | 79.86 ( $\pm$ 2.24)          | 4523.9 ( $\pm$ 635.9)         |
| CO <sub>2</sub> bearing NH <sub>4</sub> OH solvent + Solution bearing La and Ni (1:1) | 99.94 ( $\pm$ 0.005) [16.86 ( $\pm$ 0.63)]        | 83.45 ( $\pm$ 3.57)          | 8405.3 ( $\pm$ 291)           |
| CO <sub>2</sub> bearing NH <sub>4</sub> OH solvent + Solution bearing La and Ni (2:1) | 99.96 ( $\pm$ 0.0006) [18.97 ( $\pm$ 1.9)]        | 91.22 ( $\pm$ 2.13)          | 11629.7 ( $\pm$ 1437)         |
| CO <sub>2</sub> bearing MEA solvent + Solution bearing La and Ni (1:2)                | 99.76 ( $\pm$ 0.02) [16.43 ( $\pm$ 1.1)]          | 77.32 ( $\pm$ 0.43)          | 2131.5 ( $\pm$ 35.7)          |
| CO <sub>2</sub> bearing MEA solvent + Solution bearing La and Ni (1:1)                | 99.9 ( $\pm$ 0.0006) [31.27 ( $\pm$ 2.53)]        | 79.26 ( $\pm$ 1.74)          | 3620 ( $\pm$ 8.1)             |
| CO <sub>2</sub> bearing MEA solvent + Solution bearing La and Ni (2:1)                | 99.82 ( $\pm$ 0.15) [35.21 ( $\pm$ 2.97)]         | 85.52 ( $\pm$ 3.85)          | 4456.7 ( $\pm$ 637.4)         |
| CO <sub>2</sub> bearing DETA solvent + Solution bearing La and Ni (1:2)               | 99.53 ( $\pm$ 0.07) [0.78 ( $\pm$ 0.78)]          | 98.23 ( $\pm$ 1.77)          | 11052*                        |

|                                                                                          |                                  |                 |         |
|------------------------------------------------------------------------------------------|----------------------------------|-----------------|---------|
| CO <sub>2</sub> bearing DETA solvent +<br>Solution bearing La and Ni (1:1)               | 99.62 (± 0.02) [2.76 (± 2.76)]   | 99.19 (± 0.81)  | 9145*   |
| CO <sub>2</sub> bearing DETA solvent +<br>Solution bearing La and Ni (2:1)               | 99.78 (± 0.01) [2.73 (± 2.73)]   | 98.61 (± 1.39)  | 8784*   |
| CO <sub>2</sub> bearing NH <sub>4</sub> OH solvent +<br>Solution bearing Nd and Ni (1:2) | 99.94 (± 0.04) [42.14 (± 6.63)]  | 57.61 (± 1.37)  | 11793   |
| CO <sub>2</sub> bearing NH <sub>4</sub> OH solvent +<br>Solution bearing Pr and Ni (1:2) | 99.92 (± 0.02) [42.97 (± 6.55)]  | 58.14 (± 2.71)  | 3184.7  |
| CO <sub>2</sub> bearing NH <sub>4</sub> OH solvent +<br>Solution bearing Dy and Ni (1:2) | 99.77 (± 0.03) [25.01 (± 19.25)] | 73.82 (± 17.36) | 6239.1  |
| CO <sub>2</sub> bearing NH <sub>4</sub> OH solvent +<br>Solution bearing Eu and Ni (1:2) | 97.54 (± 2.32) [10.45 (± 2.55)]  | 85.05 (± 3.36)  | 8818.34 |

- 1
- 2
- 3
- 4
- 5
- 6
- 7
- 8
- 9
- 10
- 11
- 12
- 13
- 14
- 15
- 16
- 17
- 18

1

2

3

4 **Table S.2:** Stability Constants for possible complexes formed by Nickel and REE species with the  
 5 solvents used (NH<sub>4</sub>OH, MEA and DETA) and CO<sub>2</sub> species.

| Metal ion (M)    | Complexing ion/solution (L)   | Equilibrium (s = solid)           | Log K       | Temperature (°C) [Ionic Strength] | Source |
|------------------|-------------------------------|-----------------------------------|-------------|-----------------------------------|--------|
| Ni <sup>2+</sup> | NH <sub>4</sub> OH            | ML                                | 2.72 – 2.85 | 25[0 – 0.5]                       | 4      |
| Ni <sup>2+</sup> | NH <sub>4</sub> OH            | ML <sub>2</sub>                   | 4.89 – 5.14 | 25[0 – 0.5]                       | 4      |
| Ni <sup>2+</sup> | NH <sub>4</sub> OH            | ML <sub>3</sub>                   | 6.55 – 6.92 | 25[0 – 0.5]                       | 4      |
| Ni <sup>2+</sup> | NH <sub>4</sub> OH            | ML <sub>4</sub>                   | 7.67 – 8.17 | 25[0 – 0.5]                       | 4      |
| Ni <sup>2+</sup> | NH <sub>4</sub> OH            | ML <sub>5</sub>                   | 8.34 – 8.95 | 25[0 – 0.5]                       | 4      |
| Ni <sup>2+</sup> | NH <sub>4</sub> OH            | ML <sub>6</sub>                   | 8.31 – 9.12 | 25[0 – 0.5]                       | 4      |
| Ni <sup>2+</sup> | MEA                           | ML                                | 2.98 – 3.06 | 25[0.1 – 0.5]                     | 5      |
| Ni <sup>2+</sup> | MEA                           | ML <sub>2</sub>                   | 5.33 – 5.52 | 25[0.1 – 0.5]                     | 5      |
| Ni <sup>2+</sup> | MEA                           | ML <sub>3</sub>                   | 6.95 – 7.33 | 25[0.1 – 0.5]                     | 5      |
| Ni <sup>2+</sup> | DETA                          | ML                                | 10.5        | 25[0.1 ]                          | 5      |
| Ni <sup>2+</sup> | DETA                          | ML <sub>2</sub>                   | 18.6        | 25[0.1]                           | 5      |
| Ni <sup>2+</sup> | CO <sub>3</sub> <sup>2-</sup> | ML                                | 3.57        | 25[0.7]                           | 6      |
| Ni <sup>2+</sup> | CO <sub>3</sub> <sup>2-</sup> | ML(s)                             | -6.87       | 25[0]                             | 4      |
| La <sup>3+</sup> | CO <sub>3</sub> <sup>2-</sup> | M <sub>2</sub> L <sub>3</sub> (s) | -33.4       | 25[0]                             | 4      |
| Nd <sup>3+</sup> | CO <sub>3</sub> <sup>2-</sup> | M <sub>2</sub> L <sub>3</sub> (s) | -33.0       | 25[0]                             | 4      |
| Dy <sup>3+</sup> | CO <sub>3</sub> <sup>2-</sup> | M <sub>2</sub> L <sub>3</sub> (s) | -31.5       | 25[0]                             | 4      |
| Eu <sup>3+</sup> | CO <sub>3</sub> <sup>2-</sup> | M <sub>2</sub> L <sub>3</sub> (s) | -32.3       | 25[0]                             | 7      |

6

7

8

9



1

2

1

2 **Table S.3:** Possible Reaction pathways for REE-MEA-CO<sub>2</sub>-H<sub>2</sub>O system.

| Phenomena                       | Reactions                                                                                                                                                                                                 | Refs |
|---------------------------------|-----------------------------------------------------------------------------------------------------------------------------------------------------------------------------------------------------------|------|
| <b>Water dissociation</b>       | $\text{H}_2\text{O}_{(l)} \rightarrow \text{H}^+_{(aq)} + \text{OH}^-_{(aq)}$                                                                                                                             | 8    |
| <b>CO<sub>2</sub> hydration</b> | $\text{CO}_{2(aq)} + \text{H}_2\text{O}_{(l)} \rightarrow \text{H}_2\text{CO}_3^*_{(aq)}$                                                                                                                 | 8    |
|                                 | $\text{H}_2\text{CO}_3^*_{(aq)} \rightarrow \text{HCO}_3^-_{(aq)} + \text{H}^+_{(aq)}$                                                                                                                    | 8    |
|                                 | $\text{HCO}_3^-_{(aq)} \rightarrow \text{CO}_3^{2-}_{(aq)} + \text{H}^+_{(aq)}$                                                                                                                           | 8    |
| <b>Carbamate Formation</b>      | $\text{HCO}_3^-_{(aq)} + \text{H}_2\text{NC}_2\text{H}_4\text{OH}_{(aq)} \rightarrow \text{HOC}_2\text{H}_4\text{NHCOO}^-_{(aq)} + \text{H}_2\text{O}_{(l)}$                                              | 8,9  |
|                                 | $\text{CO}_3^{2-}_{(aq)} + \text{H}^+_{(aq)} + \text{H}_2\text{NC}_2\text{H}_4\text{OH}_{(aq)} \rightarrow \text{HOC}_2\text{H}_4\text{NHCOO}^-_{(aq)} + \text{H}_2\text{O}_{(l)}$                        | 9    |
|                                 | $\text{HOC}_2\text{H}_4\text{NHCOO}^- + \text{H}^+_{(aq)} + \text{H}_2\text{O}_{(l)} \rightarrow \text{HCO}_3^-_{(aq)} + \text{HOC}_2\text{H}_4\text{NH}_2\text{H}^+_{(aq)}$                              | 9    |
| <b>REE Carbonate Formation</b>  | $2\text{REE}^{3+}_{(aq)} + 3\text{HCO}_3^-_{(aq)} \rightarrow \text{REE}_2(\text{CO}_3)_{3(s)} + 3\text{H}^+_{(aq)}$                                                                                      |      |
|                                 | $2\text{REE}^{3+}_{(aq)} + 3\text{CO}_3^{2-}_{(aq)} \rightarrow \text{REE}_2(\text{CO}_3)_{3(s)}$                                                                                                         |      |
|                                 | $\text{HOC}_2\text{H}_4\text{NHCOO}^-_{(aq)} + \text{REE}^{3+}_{(aq)} \rightarrow \text{REE}(\text{HOC}_2\text{H}_4\text{NHCOO}^-)_{3(aq)}$                                                               |      |
| <b>MEA Regeneration</b>         | $2\text{REE}(\text{HOC}_2\text{H}_4\text{NHCOO}^-)_{3(aq)} + 9\text{H}^+_{(aq)} \rightarrow \text{REE}_2(\text{CO}_3)_{3(s)} + 6\text{H}_2\text{NC}_2\text{H}_4\text{OH}_{(aq)} + 3\text{HCO}_3^-_{(aq)}$ |      |

3 REE is an abbreviation for Rare Earth Elements including La, Pr, Dy, Nd, and Eu used in this study.

4

5

6

7

8

9

10

1

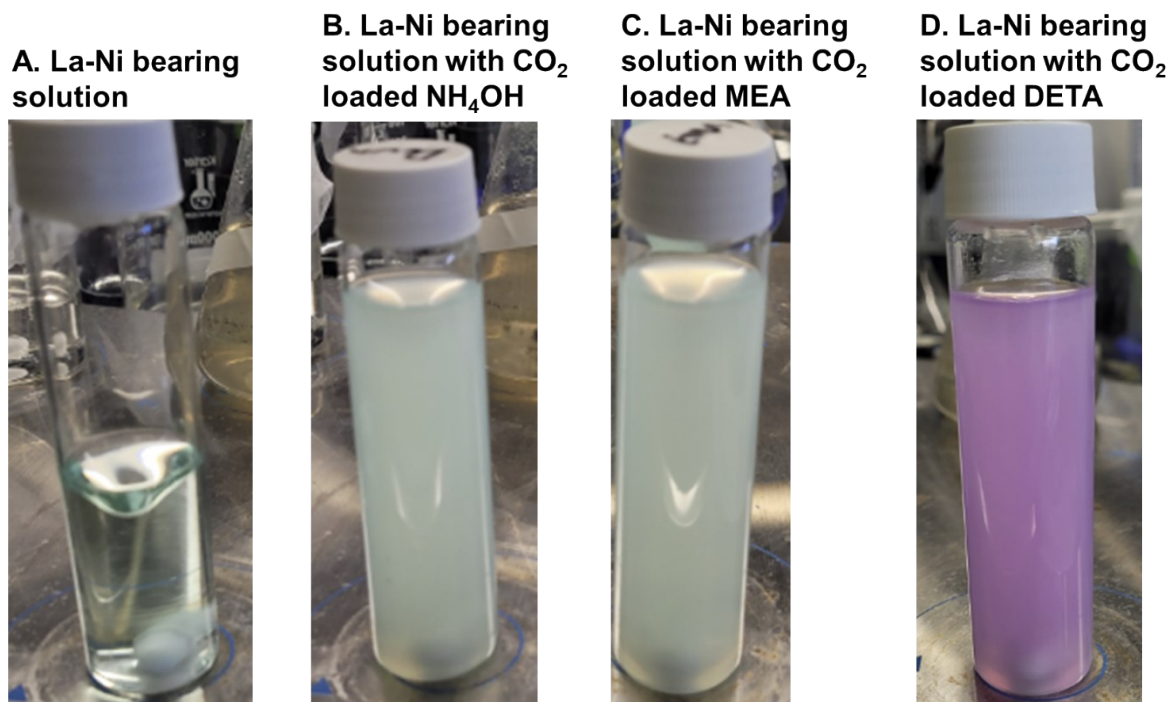

2

3 **Fig. S.1:** Snapshot showing (a) Lanthanum and Nickel bearing solution before reaction with  
4 solvents. Snapshot of Lanthanum and Nickel bearing solution during reaction with CO<sub>2</sub> loaded  
5 solvents including (b) NH<sub>4</sub>OH, (c) MEA, and (d) DETA.

6

7

8

9

10

11

12

13

14

15

16

17

18

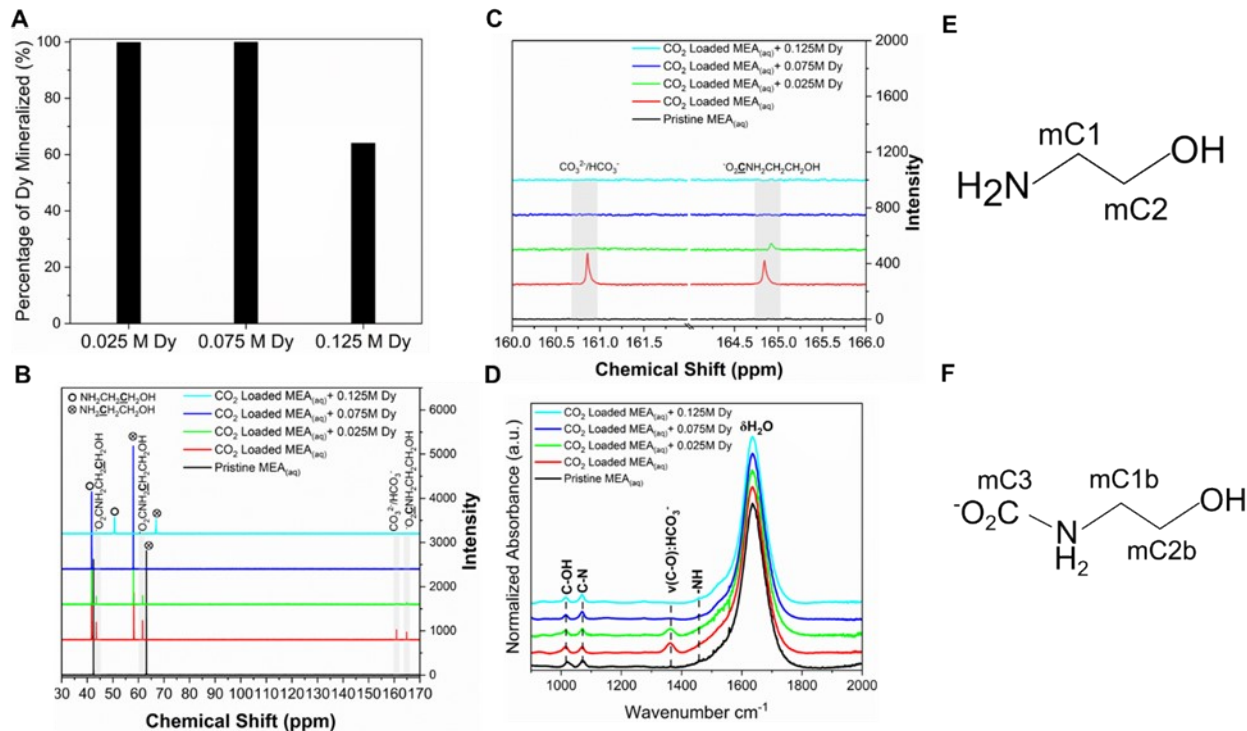

1  
2

3 **Fig. S.2:** Solvent regeneration experiments with aqueous CO<sub>2</sub> loaded Monoethanolamine (MEA)  
 4 using various concentrations of solution bearing Dysprosium (Dy). All experiments were carried  
 5 out at room temperature for 1 hour. a) Extent of CO<sub>2</sub> mineralization as Dy carbonate as a function  
 6 of increasing Dy concentration. b) FTIR spectra showing aqueous solvent transformations before  
 7 CO<sub>2</sub> loading (pristine MEA at 0.25M) , after CO<sub>2</sub> loading, after reaction with 0.025 M Dy in  
 8 solution, after reaction with 0.075 M Dy in solution, and after reaction with 0.125 M Dy in solution.  
 9 c) <sup>13</sup>C NMR spectrum of solution transformations before CO<sub>2</sub> loading (pristine MEA at 0.25M) ,  
 10 after CO<sub>2</sub> loading, after reaction with 0.025 M Dy in solution, after reaction with 0.075 M Dy in  
 11 solution, and after reaction with 0.125 M Dy in solution. d) Inset of (c) showing the formation and  
 12 disappearance of carbamate and bicarbonate ions during CO<sub>2</sub> loading and with increasing Dy  
 13 concentrations respectively. e) The structure and labeled carbon nuclei for MEA, and f) The  
 14 structure and labeled carbon nuclei for MEACOO<sup>-</sup>. See Table S.3 for possible reactions associated  
 15 with these transformations.

16  
17  
18  
19

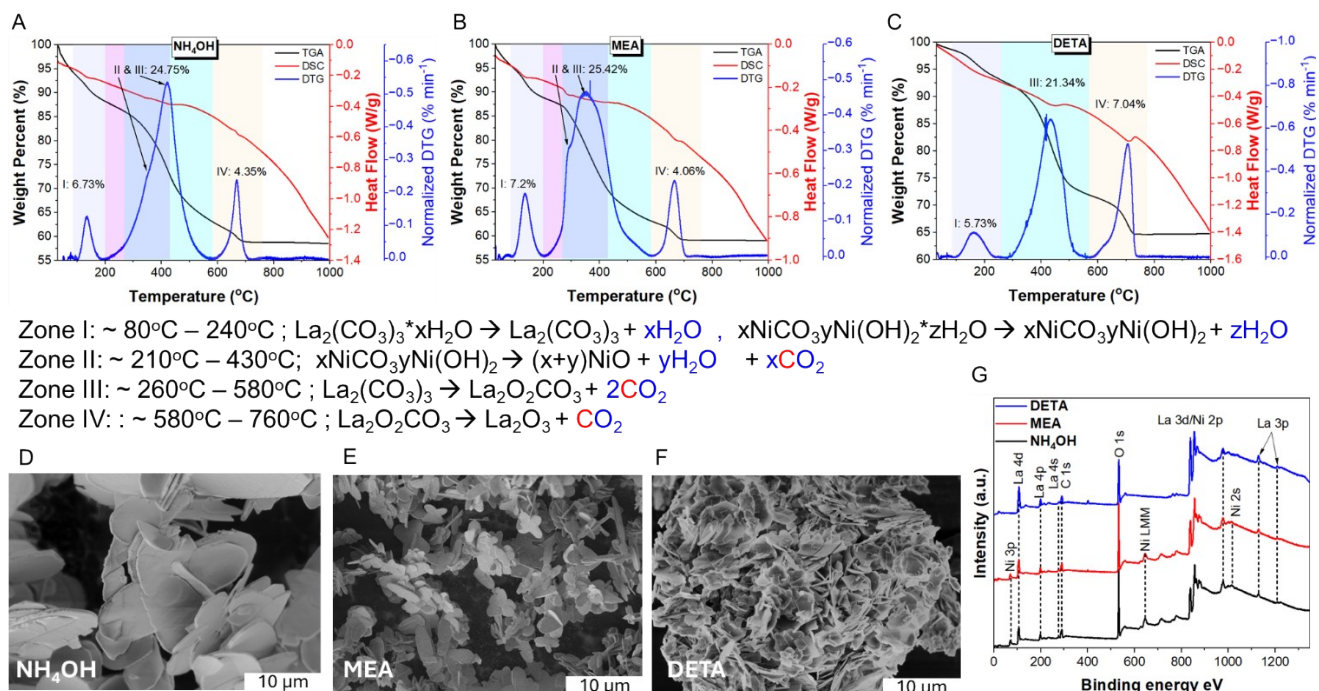

1

2 **Fig. S.3.** Evidence of carbonate formation based on TGA analyses of the product obtained by using  
 3 (a) NH<sub>4</sub>OH, (b) MEA, and (c) DETA. Detailed reactions showing the release of volatile  
 4 components, and their associated temperature ranges are outlined. SEM images showing the  
 5 rosette and flat like morphologies of carbonate products obtained post La separation using (d)  
 6 NH<sub>4</sub>OH, (e) MEA, and (f) DETA. XPS survey scans show the elemental distribution of the product  
 7 for all cases in (h). Rosette and flat morphologies in all lanthanum carbonate samples produced is  
 8 consistent with prior published results<sup>10</sup>

9

10

11

12

13

14

15

16

17

18

19

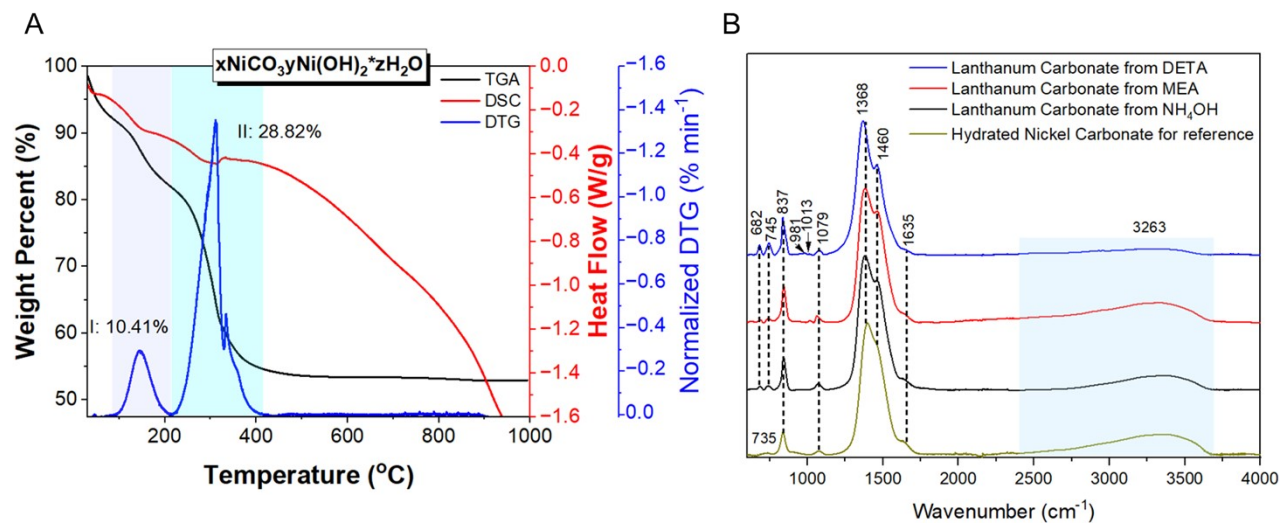

1

2

3

4

5

6

7

8

9

10

11

12

**Fig. S.4: (a)** Decomposition behavior of nickel carbonate is evident from TGA, DTG and DSC curves. **(b)** The bonding states obtained for carbonate products obtained using NH<sub>4</sub>OH, MEA and DETA as solvents are shown in the FTIR spectra. Evidence of Ni(OH)<sub>2</sub> formation is observed with the absence of OH stretching peak at wavenumber of 3645 (± 3) cm<sup>11,12</sup>

**A. MEA–La-Ni-CO<sub>2</sub> mixture after centrifugation**

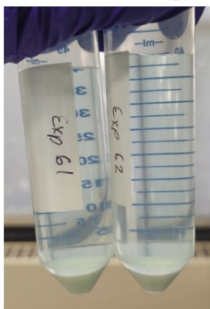

**C. MEA–La-Ni-CO<sub>2</sub> mixture after centrifugation**

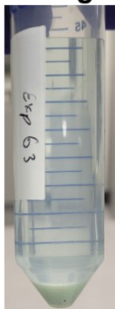

**E. DETA–La-Ni-CO<sub>2</sub> mixture after centrifugation**

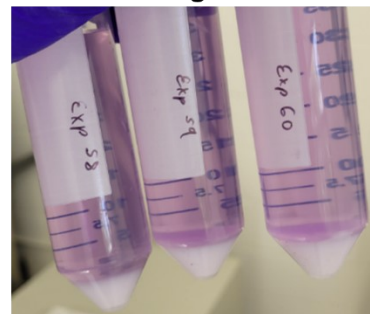

**B. Recovered Carbonate using NH<sub>4</sub>OH**

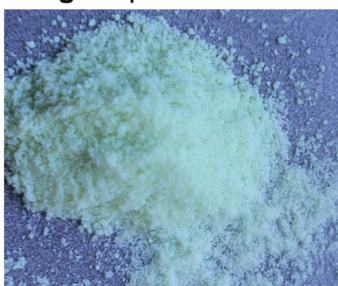

**D. Recovered Carbonate using MEA**

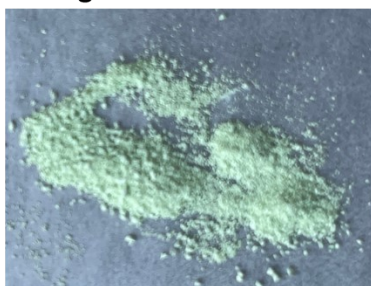

**F. Recovered Carbonate using DETA**

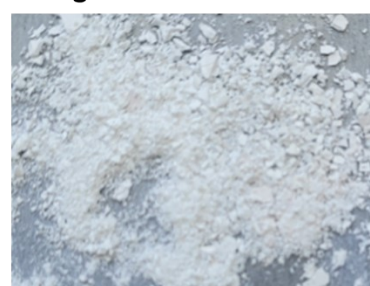

1

2 **Fig. S.5:** Snapshot of product slurry after centrifugation for NH<sub>4</sub>OH, MEA and DETA are shown  
3 in (a), (c), and (e), respectively. Dried product recovered for analysis using NH<sub>4</sub>OH, MEA, and  
4 DETA is shown in (b), (d), and (f), respectively.

5

6

7

8

9

10

11

12

13

14

15



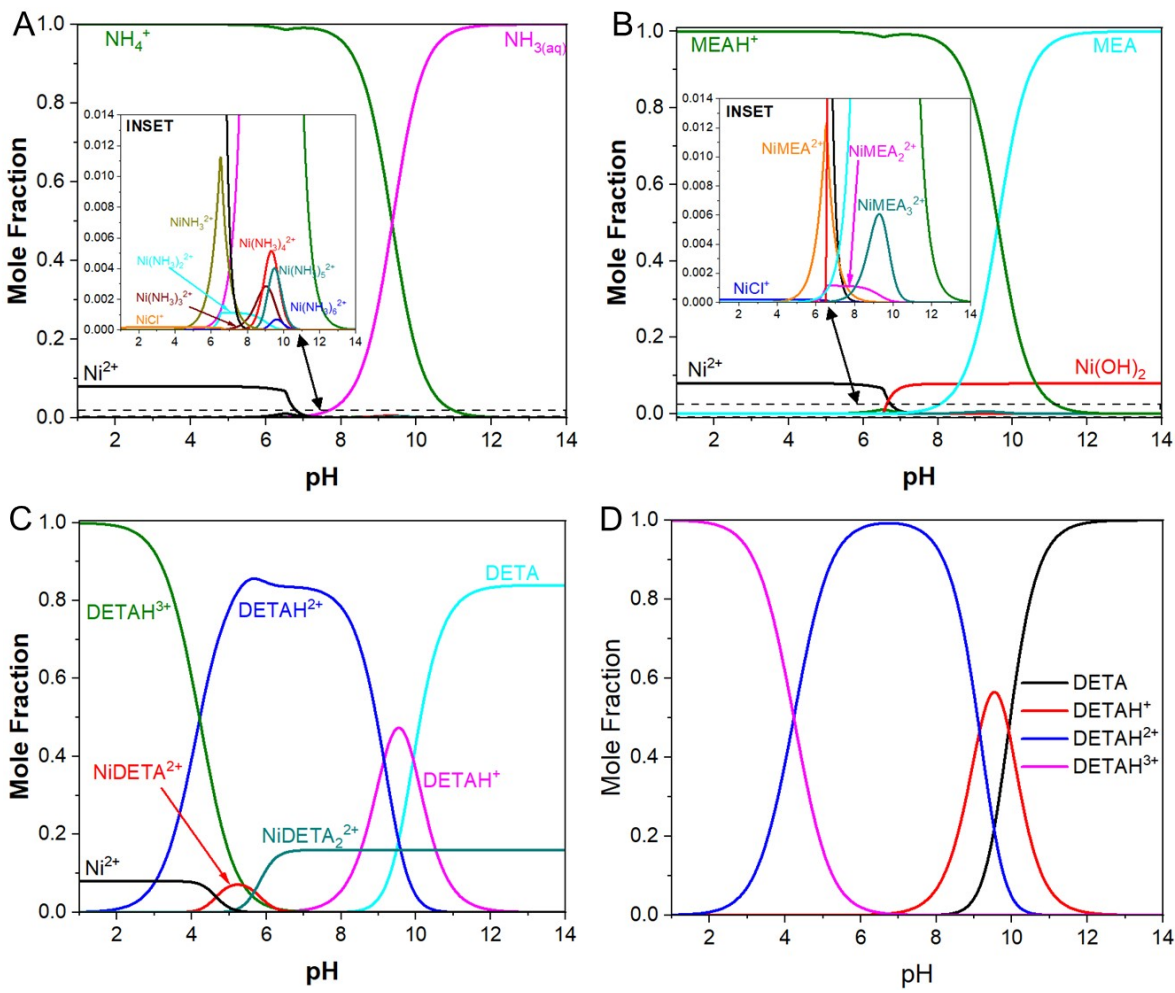

1  
2  
3  
4  
5

**Fig. S.6:** Speciation of Ni in the presence of (a)  $\text{NH}_4\text{OH}$ , (b)  $\text{MEA}$  and (c)  $\text{DETA}$  speciation in water as a function of pH is shown.  $\text{DETA}$  speciation in water as a function of pH is shown in (d).



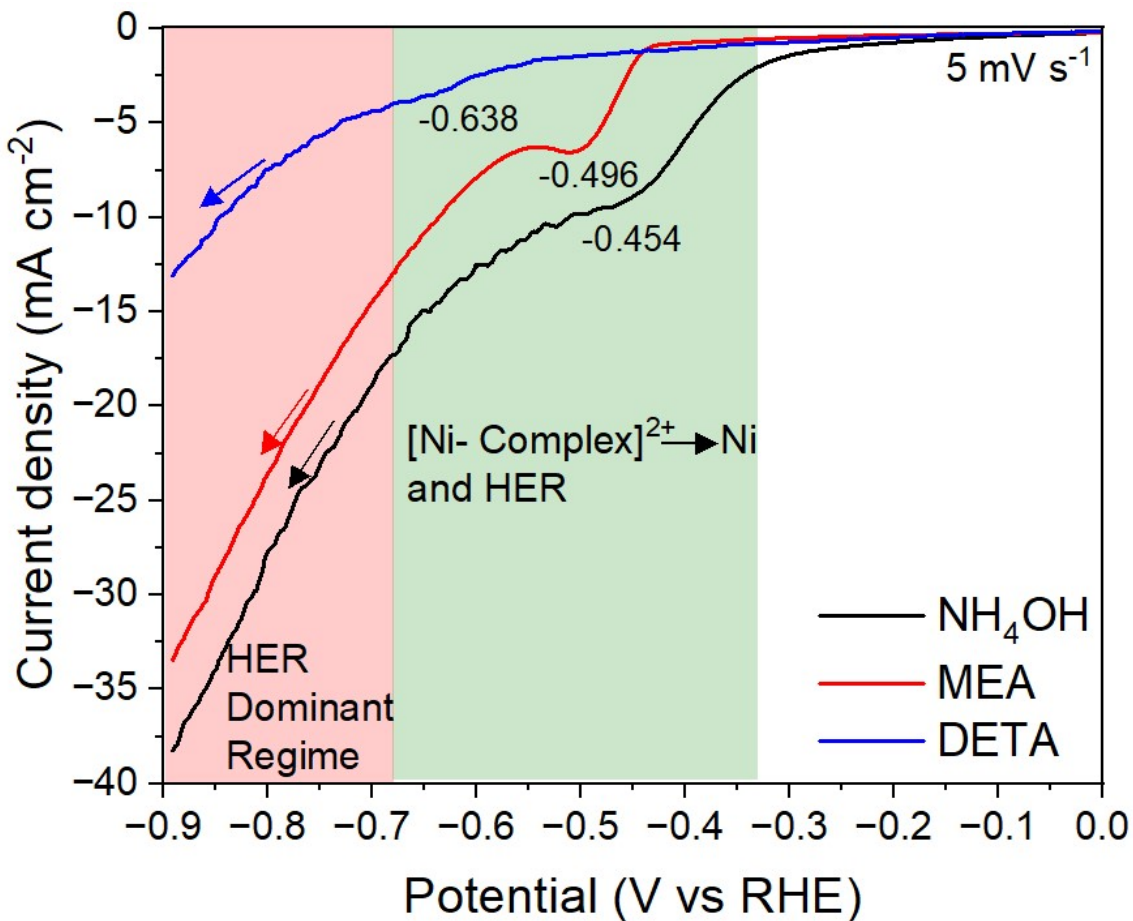

1  
2  
3  
4  
5  
6  
7  
8  
9  
10  
11  
12  
13  
14

**Fig. S.7.** LSV curves of Titanium electrode surface is shown in different solvents with scanning rate of  $5 \text{ mVs}^{-1}$

1

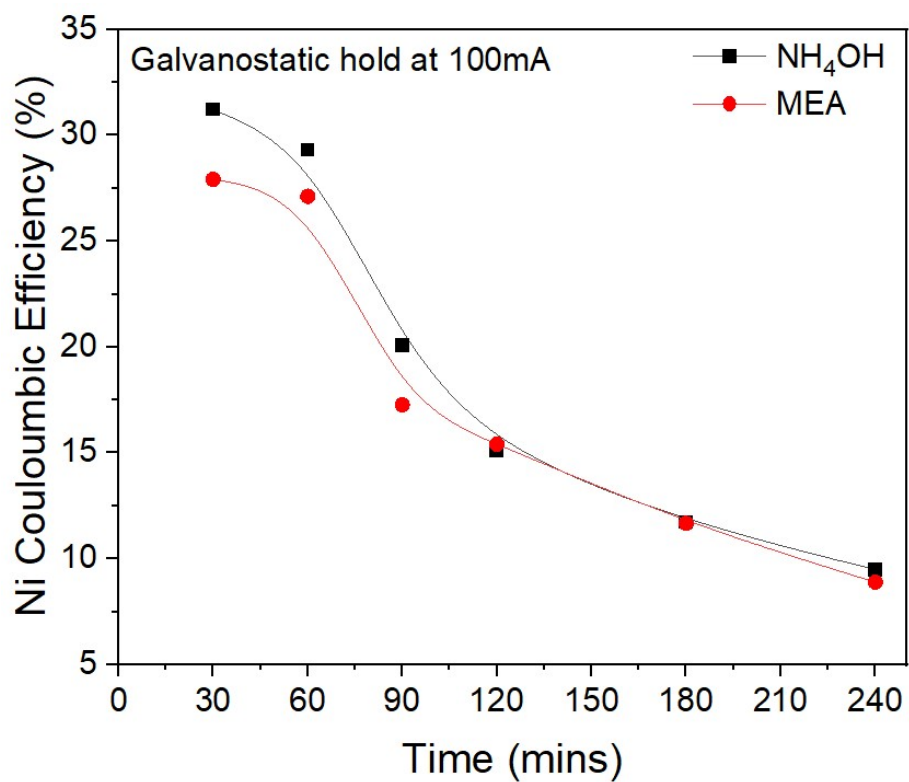

2

3 **Fig. S.8:** Ni coulombic efficiency as a function of time using 1.2 g/L of nickel in NH<sub>4</sub>OH and  
4 MEA solvents.

5

6

7

8

9

10

11

12

13

14

15

16

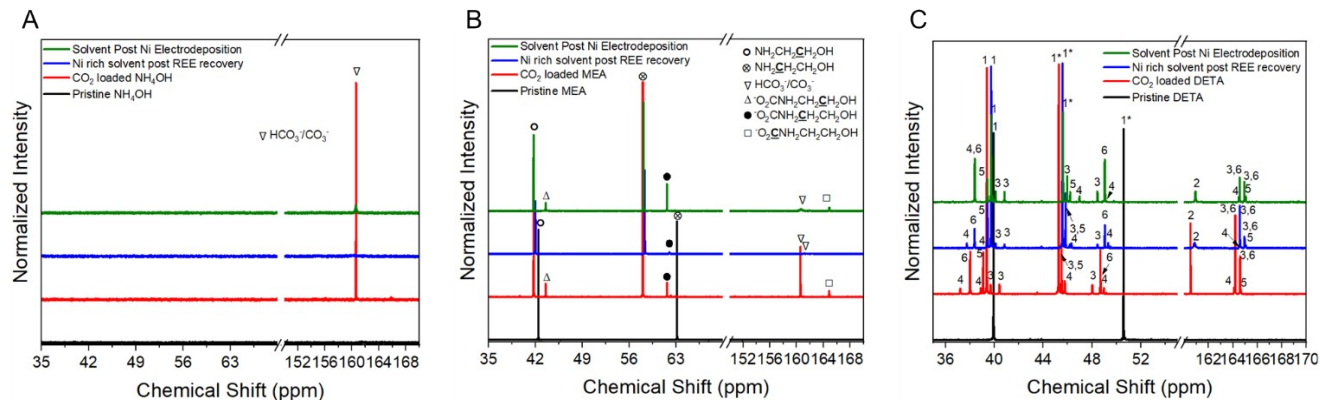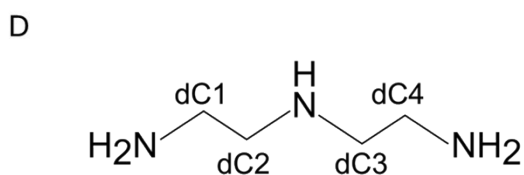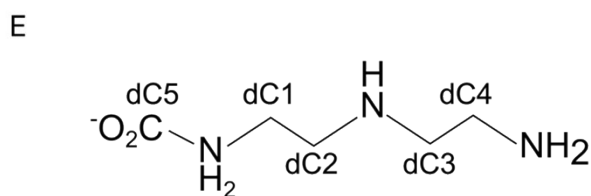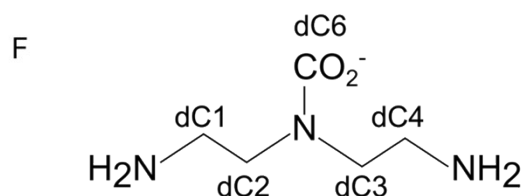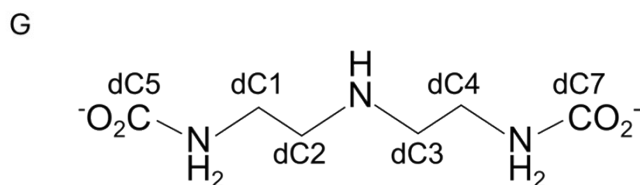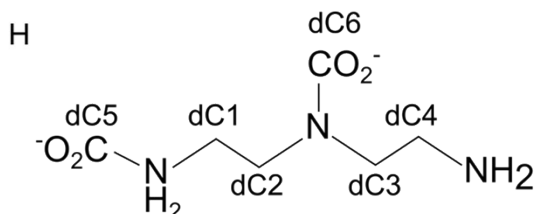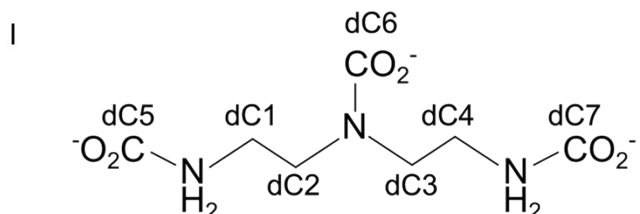

**Fig. S.9:**  $^{13}\text{C}$  NMR spectrum of pristine solvent,  $\text{CO}_2$  loaded solvent, solvent post REE separation and solvent after electrodeposition in (a)  $\text{NH}_4\text{OH}$ , (b) MEA, and (c) DETA solvents. Labelling in (c) 1/1\* - Free DETA [ $2\text{HN}(\text{CH}_2)_2\text{NH}(\text{CH}_2)_2\text{NH}_2$ ], 2 - Bicarbonate/Carbonate [ $\text{HCO}_3^-/\text{CO}_3^{2-}$ ], 3-6 Carbamate for single  $\text{CO}_2$  on either side of the primary amine, 4- Carbamate for two  $\text{CO}_2$  on a primary and secondary amine, 5- Secondary carbamate for single  $\text{CO}_2$  on secondary amine, and 6-8 - Carbamate for two  $\text{CO}_2$  on primary amines is shown. No decomposition or dissociation of solvent is observed using the proposed approach. This is also in agreement with FTIR analysis shown in Fig S. 13. It is important to note that the NMR spectra for solvent post Ni electrodeposition was done for the case where 10%  $\text{CO}_2$  was also bubbled during electrodeposition experiments. (e-i) Structural representation of the various carbamate species that can form during the  $\text{CO}_2$  loading of DETA.

## 1 NMR Analysis of Fig S. 9

2 For  $\text{NH}_4\text{OH}$ , only carbonate/bicarbonate species were observed using  $^{13}\text{C}$  NMR which completely  
3 disappears with the introduction of solution bearing Lanthanum and reappears during  
4 electrochemical recovery of nickel from solution with simultaneous  $\text{CO}_2$  bubbling.

5 Free, unreacted MEA features 2 peaks in its  $^{13}\text{C}$  NMR spectrum, corresponding to each of its 2  
6 carbon nuclei, mC1 and mC2 (See Fig. S.2 e). MEA-carbamates feature a shift in these two peaks,  
7 making the formation of  $\text{MEACOO}^-$  easily discernible by the appearance of a second set of peaks,  
8 corresponding to carbons mC1b and mC2b along with the carbamate carbon, mC3 (Fig. S.2f). The  
9  $\text{MEAH}^+$  expected to form via Table S.3 does not have NMR peaks discernible from those of  
10 unreacted MEA.<sup>13</sup> In these experiments, the formation of MEA-carbamates is observed during  
11  $\text{CO}_2$  loading via bubbling. Following the introduction of nickel/lanthanum-bearing solution for  
12 the recovery of lanthanum carbonates, the peaks associated with MEA-carbonates/carbamate are  
13 either reduced or no longer present, suggesting their consumption in the process. The  
14 electrochemical recovery of nickel from solution with simultaneous  $\text{CO}_2$  bubbling regenerates  
15 MEA-carbamates, as is shown by the reemergence of peaks mC3, mC1b, and mC2b.

16 Due to its symmetry, free DETA exhibits only 2  $^{13}\text{C}$  NMR peaks. However, DETA features 3  
17 amine sites for carbamate formation, resulting in a variety of carbamate species apparent in the  
18 degree of peak splitting observed in the  $^{13}\text{C}$  NMRs of DETA solution following  $\text{CO}_2$  loading (Fig.  
19 S.9b).  $\text{CO}_2$  loading results in the splitting of DETA's two peaks into a collection of smaller peaks  
20 (Fig. S.9b), indicative of the variety of carbamate species forming during the loading process. The  
21 dominance of the free DETA peaks suggest that it remains the main DETA species in solution.  
22 Following the recovery of lanthanum via precipitation, a decrease in all carbamate peaks is  
23 observed, though not to the extent that is observed with MEA. The most notable decrease is seen  
24 in the  $\text{CO}_3^{2-}/\text{HCO}_3^-$  peak, in this case attributed to  $\text{HCO}_3^-$  due to its position between 160.5-  
25 161.0ppm. As expected, pure DETA exhibits a clear lack of peaks in the range of 160ppm-166ppm  
26 (Fig. S.9b). Following  $\text{CO}_2$  loading, a strong  $\text{HCO}_3^-$  peak is observed, along with the various  
27 carbamate peaks expected of highly loaded DETA.<sup>14</sup> It is also of interest to note that following  
28 electrochemical recovery of nickel, carbamate peaks were seen to make stronger resurgence than  
29 the  $\text{HCO}_3^-$  peak (Fig. S.9b), indicating that  $\text{CO}_2$  loading during electrochemical recovery of nickel  
30 encourages the capturing of  $\text{CO}_2$  in the form of carbamate.

31

32

33

34

35

36

37

1

2

A

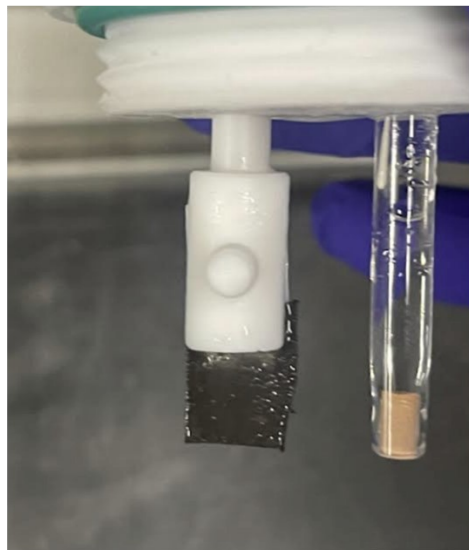

B

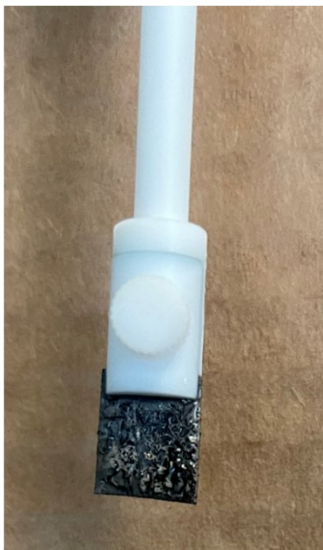

C

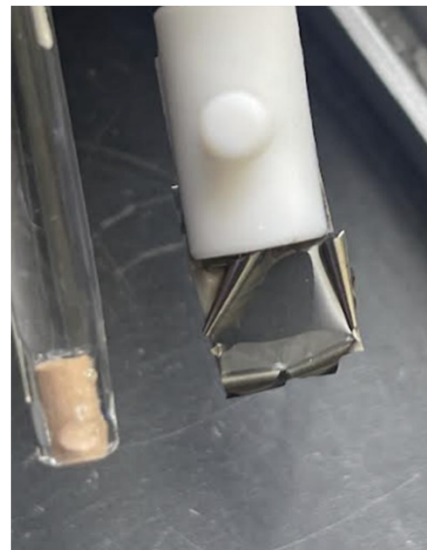

3

4 **Fig. S.10:** Snapshot of electrodes confirming successful nickel electrodeposition on the surface of  
5 the electrodes. **(a)** Electrodeposition in  $\text{NH}_4\text{OH}$  solvent at galvanostatic hold of 100 mA for 4  
6 hours. **(b)** Electrodeposition in MEA solvent at galvanostatic hold of 100 mA for 4 hours. **(c)**  
7 Electrodeposition in  $\text{NH}_4\text{OH}$  solvent at potentiostatic hold of -0.45 V (vs RHE) for 2 hours.

8

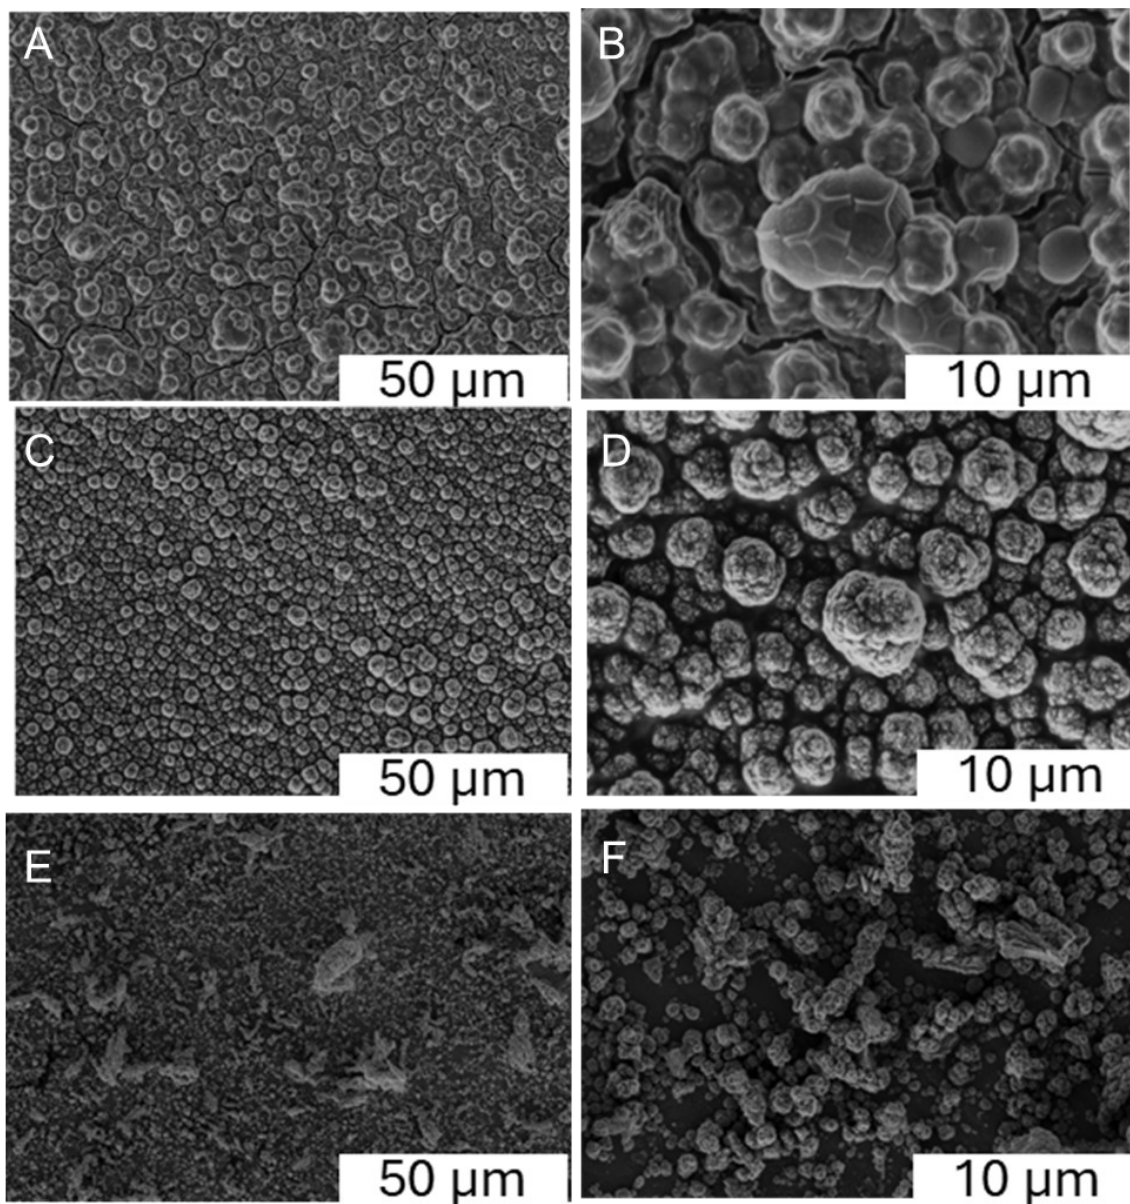

1  
2  
3  
4  
5  
6  
7  
8  
9

**Fig. S.11.** Morphologies of the electrodeposited nickel in  $\text{NH}_4\text{OH}$ , MEA, and DETA are evident in (f), (h), and (j) at a resolution of  $50\ \mu\text{m}$ , and in (g), (i), and (k) at a resolution of  $10\ \mu\text{m}$ , respectively. The anolyte used in all experiments is  $0.25\ \text{M}\ \text{NaNO}_3$  solution and experiments are performed at room temperature.



1

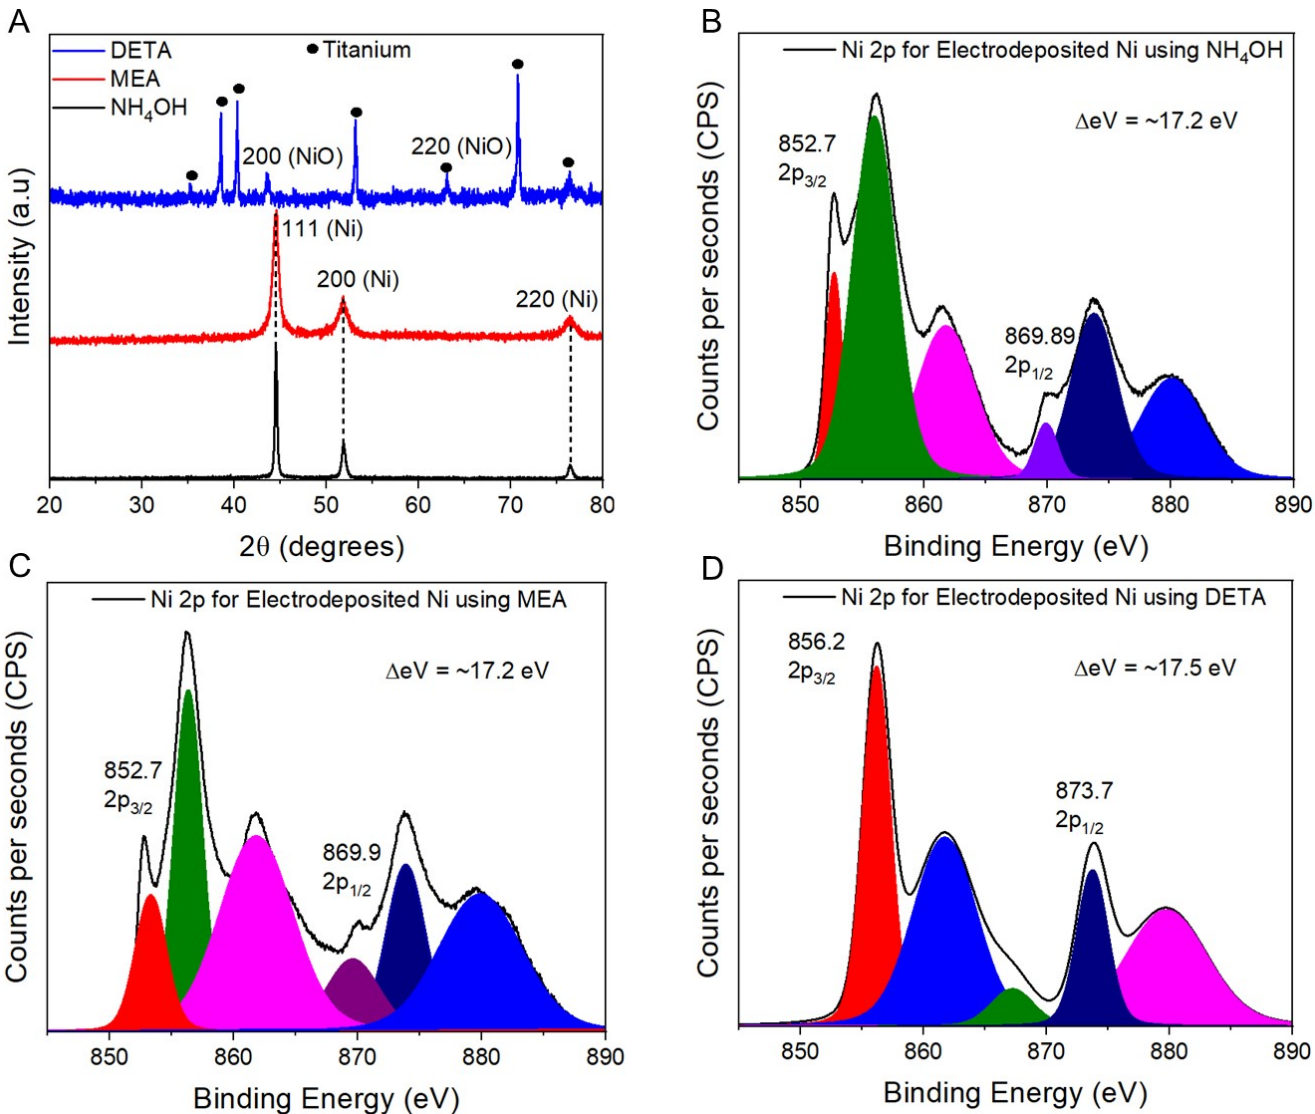

2

3 **Fig S.12:** Evidence of electrodeposited nickel from NH<sub>4</sub>OH, MEA, and DETA with nickel bearing  
 4 solutions is shown in (a). High resolution scans for Ni 2p on electrodeposited nickel obtained from  
 5 (b) NH<sub>4</sub>OH, (c) MEA, and (d) DETA nickel bearing solutions using XPS.

6

7

8

9

10

11

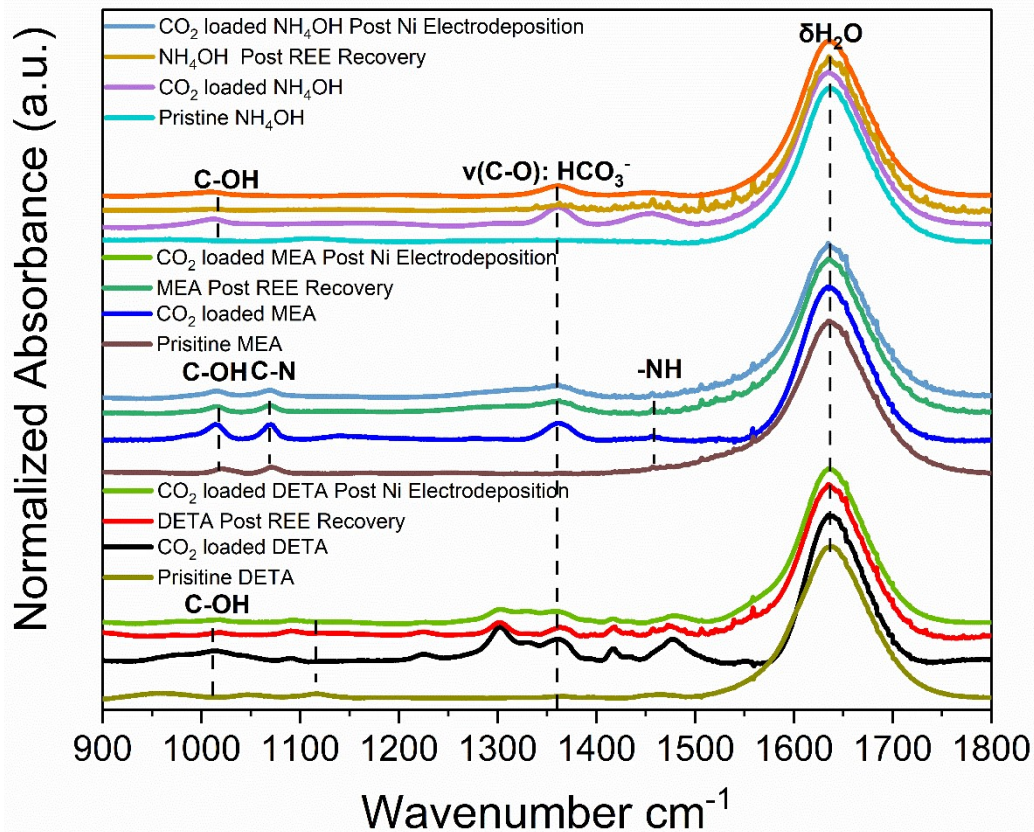

1  
 2  
 3  
 4  
 5  
 6  
 7  
 8  
 9  
 10  
 11  
 12

**Fig. S.13:** FTIR spectra showing the solvent transformations before CO<sub>2</sub> loading, after CO<sub>2</sub> loading, post REE extraction and post electrodeposition of Ni .



1

## 2 References

- 3 1 K.H. Gayer, L. Woonther , Hydrolysis of Cobalt Chloride and Nickel Chloride at 25°,  
4 1952, **74**, 1436 -1437.
- 5 2 R. Cruz-Gaona, D. Dreisinger and C. Roel Cruz, In Electrochemistry in Mineral and Metal  
6 Processing VI: Proceedings of the International Symposium, 2003, **2003**, 304.
- 7 3 A. M. Fekry, *Electrochim Acta*, 2009, **54**, 3480–3489.
- 8 4 A. E. Martell and R. M. Smith, Critical Stability Constants Volume 4: Inorganic  
9 Complexes, Springer Science & Business Media, 2013.
- 10 5 A. E. Martell and R. M. Smith, Critical Stability Constants Volume 2: Amines, Springer  
11 Science & Business Media, 2012
- 12 6 A. E. Martell and R. M. Smith, Critical Stability Constants Volume 6: Second  
13 Supplement, Springer Science & Business Media, 2013.
- 14 7 A. E. Martell and R. M. Smith, Critical Stability Constants Volume 5: First Supplement,  
15 Springer Science & Business Media, 2013
- 16 8 M. Liu, A. Hohenshil and G. Gadikota, *Energy and Fuels*, 2021, **35**, 8051–8068.
- 17 9 B. Lv, B. Guo, Z. Zhou and G. Jing, *Environ Sci Technol*, 2015, **49**, 10728–10735.
- 18 10 B. Vallina, J. D. Rodriguez-Blanco, A. P. Brown, J. A. Blanco and L. G. Benning,  
19 *Nanoscale*, 2015, **7**, 12166–12179.
- 20 11 Y. Mao, B. Zhou and S. Peng, *Journal of Materials Science: Materials in Electronics*,  
21 2020, **31**, 9457–9467.
- 22 12 M. S. Vidhya, G. Ravi, R. Yuvakkumar, D. Velauthapillai, M. Thambidurai, C. Dang and  
23 B. Saravanakumar, *RSC Adv*, 2020, **10**, 19410–19418.
- 24 13 G. J. Fan, A. G. H. Wee, R. Idem and P. Tontiwachwuthikul, *Ind Eng Chem Res*, 2009,  
25 **48**, 2717–2720.
- 26 14 A. Hartono, E. F. Da Silva, H. Grasdalen and H. F. Svendsen, *Ind Eng Chem Res*, 2007,  
27 **46**, 249–254.

28

29

30
